# Supplementary material for: Hierarchically structured, well-dispersed Ti4+ cross-linked chitosan as an efficient and recyclable sponge-like adsorbent for anionic azo-dye removal
Source: Royal Society of Chemistry journal article supplement (doi:10.1039/c6ra24446g), 2016-01-01
Supplement: c6ra24446g1.pdf [file c6ra24446g1.pdf]

## Supporting Information

Table S1 Adsorption capacity and the leaching concentration of Ti into solution for Orange II adsorption on different amount of titanium salt (SL-TiCs) at pH 2. ( $C_0 = 100$  mg/L)

| Amount of titanium salt (g) | Leaching concentration of Ti (mg/L) | Adsorption capacity to Orange II (mg/g) |
|-----------------------------|-------------------------------------|-----------------------------------------|
| 1.71                        | 0.023                               | 249                                     |
| 3.42                        | 0.028                               | 396                                     |
| 5.13                        | 1.98                                | 314                                     |

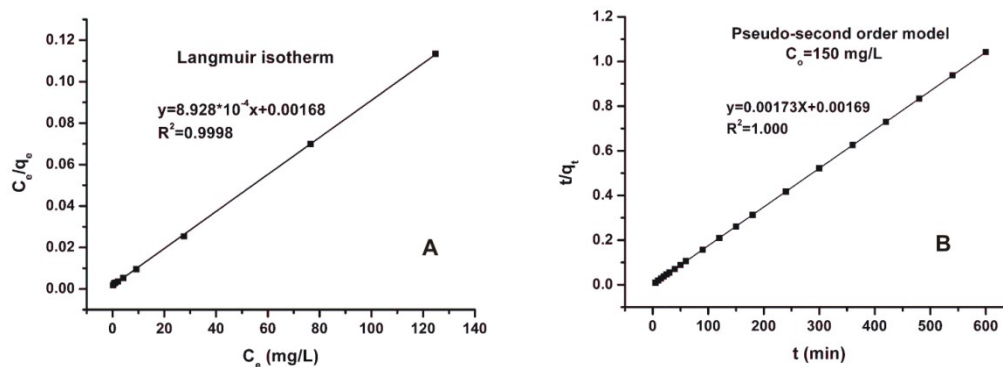

Fig. S1 Langmuir isotherm and pseudo-second order model for the adsorption of Orange II onto SL-TiCs.

Table S2 Langmuir, Freundlich isotherm constants and pseudo-first order and pseudo-second order kinetic constants for Orange II adsorption onto SL-TiCs.

| Adsorption isotherm constants |                                         | Kinetic model constants                                       |                                                                                                                                                                     |
|-------------------------------|-----------------------------------------|---------------------------------------------------------------|---------------------------------------------------------------------------------------------------------------------------------------------------------------------|
| Langmuir                      | $q_e = \frac{K_L q_m C_e}{1 + K_L C_e}$ | $K_L$ (L/mg) = 0.531<br>$q_m$ (mg/g) = 1120<br>$R^2 = 0.9998$ | Pseudo first order<br>$\log(q_e - q_t) = \log q_e - ;$<br>$k_1$ (min <sup>-1</sup> ) = $4.9 \times 10^{-3}$<br>$R^2 = 0.8038$                                       |
| Freundlich                    | $q_e = K_F C_e^{\frac{1}{n}}$           | $K_F$ (L/g) = 318<br>$n = 2.95$<br>$R^2 = 0.8113$             | Pseudo second order<br>$\frac{t}{q_t} = \frac{1}{k_2 q_e^2} + \frac{t}{q_e}$<br>$q_{m2}$ (mg/g) = 578<br>$k_2$ (g(mg/min)) = $1.77 \times 10^{-3}$<br>$R^2 = 1.000$ |
